# Supplementary material for: Synthesis of highly efficient and recyclable visible-light responsive mesoporous g-C3N4 photocatalyst via facile template-free sonochemical route
Source: Royal Society of Chemistry journal article supplement (doi:10.1039/c3ra43942a), 2013-11-28
Supplement: c3ra43942a.pdf [file c3ra43942a.pdf]

## Electronic Supplementary Information (ESI)

### Synthesis of highly efficient and recyclable visible-light responsive mesoporous g-C<sub>3</sub>N<sub>4</sub> photocatalyst via facile template-free sonochemical route

Santosh Kumar<sup>a</sup>, Surendar T<sup>a</sup>, Bharat Kumar<sup>b</sup>, Arabinda Baruah<sup>b</sup> and Vishnu Shanker<sup>a\*</sup>

<sup>a</sup>*Department of Chemistry, National Institute of Technology, Warangal-506004, A.P., India*

<sup>b</sup>*Department of Chemistry, Indian Institute of Technology, New Delhi-110016, India*

\*Corresponding Author. Tel.: +91-870-2462675; Fax: +91-870-2459547; *E-mail address:*  
vishnu@nitw.ac.in

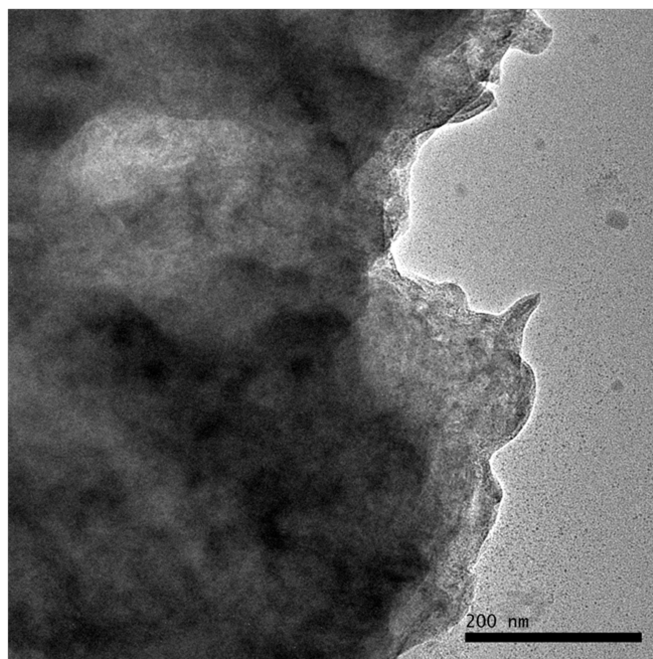

Fig. S1 TEM image of bulk g-C<sub>3</sub>N<sub>4</sub>

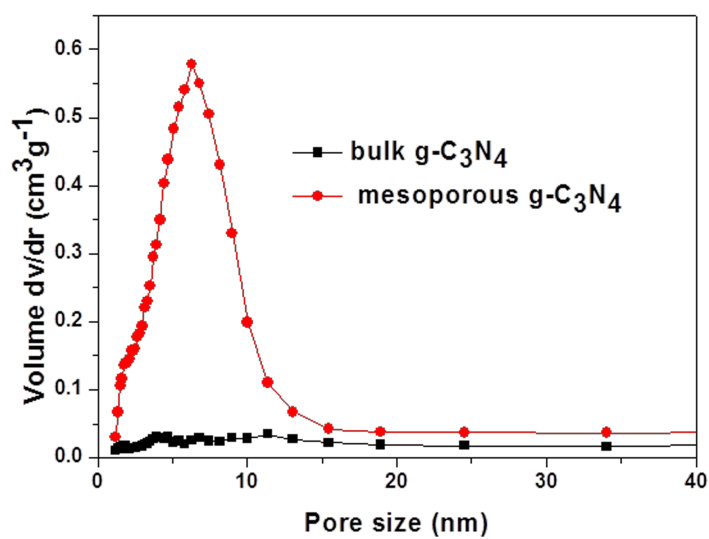

Fig. S2 Pore size distribution of bulk g-C<sub>3</sub>N<sub>4</sub> and mesoporous g-C<sub>3</sub>N<sub>4</sub>.

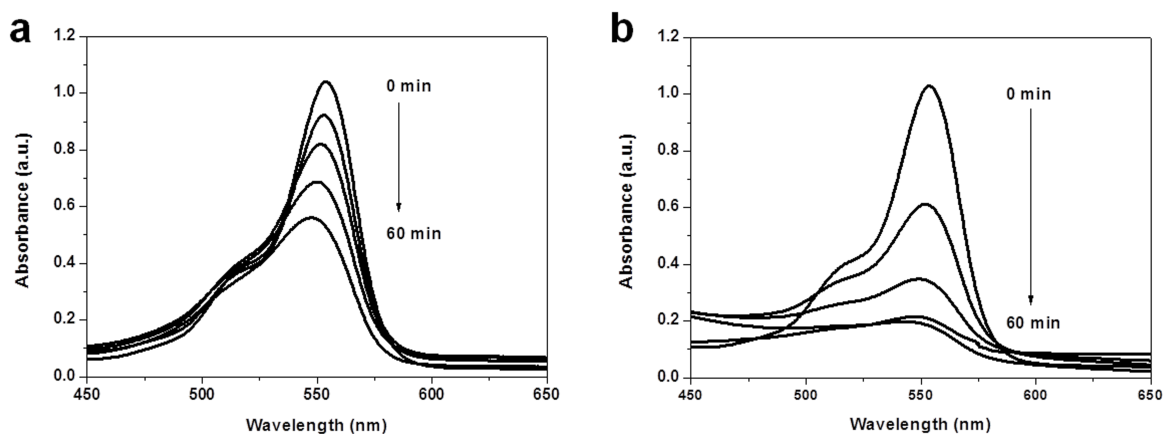

Fig. S3 Absorption spectra of RhB over bulk g-C<sub>3</sub>N<sub>4</sub> (a) and mesoporous g-C<sub>3</sub>N<sub>4</sub> (b) under visible light irradiation.

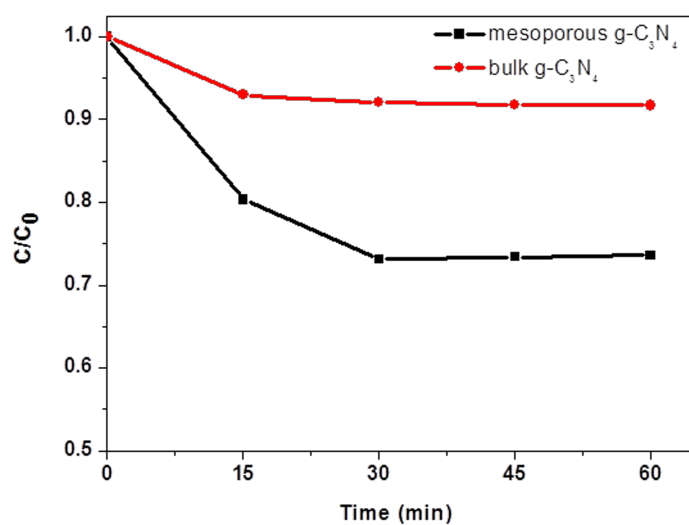

Fig. S4 Adsorption studies of RhB in aqueous solution over bulk g-C<sub>3</sub>N<sub>4</sub> and mesoporous g-C<sub>3</sub>N<sub>4</sub>.

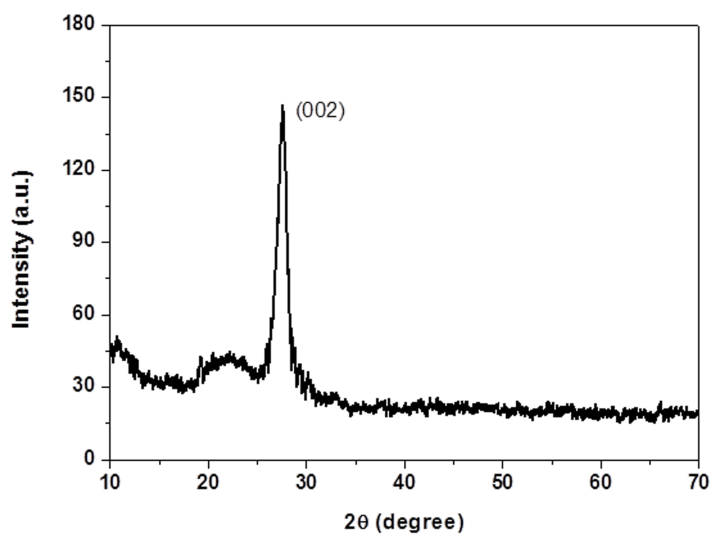

Fig. S5 XRD pattern of reused mesoporous g-C<sub>3</sub>N<sub>4</sub> after five successive experimental runs.
